# Supplementary material for: Genetic and Hormonal Regulation of Sweet Cherry (Prunus avium L.) Maturity across Altitudinal Gradients
Source: MDPI journal article supplement (doi:10.3390/horticulturae10040408), 2024-04-17

## Supplementary data

Supplementary Table S1: Average fruit physico-chemical characteristics at different maturity stages in the 6 evaluated sweet cherry varieties.

| Variety  | Location           | Sampling Date | DIAM (mm) | TA (g/l) | TSS(Brix) | ipH  | 5 Berry Weight (g) | DM (%) | FWS (KgF) |
|----------|--------------------|---------------|-----------|----------|-----------|------|--------------------|--------|-----------|
| Banni    | Arsal              | 5/7/2021      | 20.85     | 9.3      | 14.9      | 3.4  | 27.92              | 17.63  | 1.07      |
| Banni    | Kaa El Reem (High) | 21/6/2021     | 26.33     | 9.6      | 16.6      | 3.28 | 43.46              | 15.25  | 1.12      |
| Feraouni | Arsal              | 24/6/2021     | 19.85     | 12.4     | 17.45     | 3.16 | 30.48              | 16.97  | 1.66      |
| Feraouni | Arsal              | 5/7/2021      | 20.26     | 11.32    | 17.7      | 3.2  | 30.26              | 19.79  | 1.15      |
| Feraouni | Barqa              | 28/6/2021     | 27.63     | 11.79    | 18.66     | 3.17 | 52.86              | 16.16  | 1.24      |
| Feraouni | Kaa El Reem (High) | 7/6/2021      | 23.41     | 11.19    | 13.2      | 3.18 | 33.89              | 17.48  | 1.63      |
| Feraouni | Kaa El Reem (High) | 10/6/2021     | 23.89     | 11.2     | 13.68     | 3.19 | 37.08              | 17.84  | 1.33      |
| Feraouni | Kaa El Reem (High) | 17/6/2021     | 26.54     | 10.8     | 16.9      | 3.22 | 46.17              | 20.99  | 1.08      |
| Feraouni | Kaa El Reem (High) | 21/6/2021     | 25.05     | 9.66     | 16.08     | 3.27 | 40.13              | 20     | 0.95      |
| Feraouni | Kaa El Reem (High) | 28/6/2021     | 25.56     | 9.97     | 20.79     | 3.37 | 46.09              | 18.98  | 0.88      |
| Feraouni | Kaa El Reem (Low)  | 31/5/2021     | 23.36     | 12.66    | 16.97     | 3.19 | 35.15              | 20.93  | 1.22      |
| Feraouni | Qousaya            | 31/5/2021     | 21.01     | 13.53    | 18.2      | 2.96 | 25.27              | 24.24  | 1.45      |
| Feraouni | Qousaya            | 3/6/2021      | 21.16     | 12.37    | 18.05     | 2.92 | 27.03              | 25.33  | 1.53      |
| Irani    | Barqa              | 17/6/2021     | 25.83     | 9.3      | 15.98     | 3.32 | 41.64              | 18.62  | 1.27      |
| Irani    | Barqa              | 21/6/2021     | 25.96     | 9.75     | 18.67     | 3.18 | 51.31              | 18     | 1.07      |
| Irani    | Barqa              | 28/6/2021     | 27.63     | 9.33     | 20.45     | 3.34 | 49.12              | 18.34  | 0.84      |
| Irani    | Kaa El Reem (High) | 10/6/2021     | 27.24     | 13.35    | 19.65     | 3.22 | 45.65              | 23.14  | 1.26      |
| Irani    | Kaa El Reem (High) | 14/6/2021     | 26.2      | 11.47    | 19.23     | 3.42 | 43.42              | 24.99  | 1.3       |
| Irani    | Kaa El Reem (High) | 28/6/2021     | 28.03     | 9.82     | 23.75     | 3.31 | 49.79              | 23.8   | 0.82      |
| Irani    | Kaa El Reem (Low)  | 31/5/2021     | 22.58     | 9.71     | 13.65     | 3.24 | 27.94              | 19.03  | 1.13      |
| Irani    | Kaa El Reem (Low)  | 3/6/2021      | 22.54     | 10.4     | 14.12     | 3.32 | 27.69              | 19.03  | 1.11      |
| Irani    | Kaa El Reem (Low)  | 7/6/2021      | 22.24     | 9.95     | 15.41     | 3.38 | 27.61              | 20.19  | 0.87      |
| Irani    | Qousaya            | 31/5/2021     | 20.26     | 13.42    | 17.5      | 3.05 | 23.53              | 21.16  | 1.58      |
| Irani    | Qousaya            | 3/6/2021      | 21.24     | 11.31    | 16.85     | 3    | 25.28              | 21.79  | 1.47      |
| Mkahhal  | Arsal              | 5/7/2021      | 20.71     | 6.56     | 14.2      | 3.4  | 28.31              | 15.49  | 1.17      |
| Mkahhal  | Kaa El Reem (High) | 10/6/2021     | 19.17     | 8.92     | 12.95     | 3.36 | 23.09              | 15.09  | 1.63      |
| Mkahhal  | Kaa El Reem (High) | 17/6/2021     | 23.48     | 7.35     | 12.1      | 3.35 | 32.53              | 16.19  | 1.09      |
| Mkahhal  | Kaa El Reem (High) | 21/6/2021     | 23.07     | 8.32     | 14.69     | 3.21 | 33.69              | 16.5   | 1.02      |
| Mkahhal  | Kaa El Reem (High) | 28/6/2021     | 24.8      | 6.6      | 17.32     | 3.4  | 42                 | 16.54  | 0.93      |
| Mkahhal  | Kaa El Reem (Low)  | 3/6/2021      | 22.72     | 8.02     | 13.64     | 3.19 | 37.53              | 18.46  | 1.54      |
| Mkahhal  | Kaa El Reem (Low)  | 7/6/2021      | 24.5      | 7.9      | 13.96     | 3.33 | 39.51              | 19.87  | 1.32      |
| Mkahhal  | Kaa El Reem (Low)  | 10/6/2021     | 24.8      | 9        | 15.7      | 3.34 | 43.64              | 19.63  | 1.42      |
| Mkahhal  | Qousaya            | 3/6/2021      | 20.53     | 10.01    | 13.63     | 3.35 | 26.07              | 17.91  | 1.87      |
| Mkahhal  | Qousaya            | 7/6/2021      | 21.97     | 9.25     | 15.07     | 3.32 | 28.34              | 19.19  | 1.5       |
| Skeena   | Kaa El Reem (High) | 21/6/2021     | 26.45     | 9.57     | 17.17     | 3.1  | 46.06              | 17     | 1.27      |
| Skeena   | Kaa El Reem (High) | 24/6/2021     | 26.12     | 9.27     | 16.53     | 3.24 | 54.01              | 18.43  | 1.18      |



|         |                    |           |       |      |       |      |       |       |      |
|---------|--------------------|-----------|-------|------|-------|------|-------|-------|------|
| Skeena  | Kaa El Reem (High) | 28/6/2021 | 27.12 | 9.67 | 20.05 | 3.16 | 49.08 | 18.89 | 1.15 |
| Teliani | Arsal              | 10/6/2021 | 23.29 | 8.4  | 17.05 | 3.64 | 34.88 | 19.26 | 1.07 |
| Teliani | Barqa              | 31/5/2021 | 23.3  | 6.9  | 11.44 | 3.47 | 30.98 | 15.7  | 0.83 |
| Teliani | Barqa              | 3/6/2021  | 24.11 | 6.86 | 12.63 | 3.38 | 35.08 | 17.35 | 0.84 |

Supplementary Table S2: Harvested cherry varieties with their corresponding dates and locations.

| Variety       | Location                    |      | Date of Harvest |
|---------------|-----------------------------|------|-----------------|
| Banni (BA)    | Arsal                       | AR   | 05-Jul-2021     |
|               | Kaa El Reem (high altitude) | KR_H | 21-Jun-2021     |
| Feraouni (FE) | Arsal                       | AR   | 24-Jun-2021     |
|               | Barqa                       | BA   | 05-Jul-2021     |
|               |                             |      | 28-Jun-2021     |
|               | Kaa El Reem (high altitude) | KR_H | 07-Jun-2021     |
|               |                             |      | 10-Jun-2021     |
|               |                             |      | 17-Jun-2021     |
|               |                             |      | 21-Jun-2021     |
|               |                             |      | 28-Jun-2021     |
|               | Kaa El Reem (low altitude)  | KR_L | 31-May-2021     |
|               | Qoussaya                    | QO   | 31-May-2021     |
|               |                             |      | 03-Jun-2021     |
| Irani (IR)    | Barqa                       | BA   | 17-Jun-2021     |
|               |                             |      | 21-Jun-2021     |
|               |                             |      | 28-Jun-2021     |
|               | Kaa El Reem (high altitude) | KR_H | 10-Jun-2021     |
|               |                             |      | 14-Jun-2021     |
|               |                             |      | 28-Jun-2021     |
|               | Kaa El Reem (low altitude)  | KR_L | 31-May-2021     |
|               |                             |      | 03-Jun-2021     |
|               |                             |      | 07-Jun-2021     |
|               | Qoussaya                    | QO   | 31-May-2021     |
|               |                             |      | 03-Jun-2021     |
| Mkahal (Mk)   | Arsal                       | AR   | 05-Jul-2021     |
|               | Kaa El Reem (high altitude) | KR_H | 10-Jun-2021     |
|               |                             |      | 17-Jun-2021     |
|               |                             |      | 21-Jun-2021     |
|               |                             |      | 28-Jun-2021     |
|               | Kaa El Reem (low altitude)  | KR_L | 03-Jun-2021     |
|               |                             |      | 07-Jun-2021     |
|               |                             |      | 10-Jun-2021     |
|               | Qoussaya                    | QO   | 03-Jun-2021     |



|              |                             |             |
|--------------|-----------------------------|-------------|
|              |                             | 07-Jun-2021 |
| Skeena (Sk)  | Kaa El Reem (high altitude) | 21-Jun-2021 |
|              |                             | 24-Jun-2021 |
|              |                             | 28-Jun-2021 |
|              |                             | 10-Jun-2021 |
| Teliani (TE) | Arsal                       | AR          |
|              | Barqa                       | BA          |
|              |                             | 03-Jun-2021 |

Supplementary Table S3: Description of harvested varieties, location, altitudes and maturity stages of samples

| Variety  | Location           | Longitude | Latitude  | Altitude (m) | Sampling Date | DIAM (mm) | TA (g/l) | TSS(Brix) | ipH  | S Berry Weight (g) | DM (%) | FWS (KgF) |
|----------|--------------------|-----------|-----------|--------------|---------------|-----------|----------|-----------|------|--------------------|--------|-----------|
| Banni    | Arsal              | 34.095397 | 36.409924 | 2080         | 5/7/2021      | 20.85     | 9.3      | 14.9      | 3.4  | 27.92              | 17.63  | 1.07      |
| Banni    | Kaa El Reem (High) | 33.888591 | 35.872562 | 1600         | 21/6/2021     | 26.33     | 9.6      | 16.6      | 3.28 | 43.46              | 15.25  | 1.12      |
| Feraouni | Arsal              | 34.095397 | 36.409924 | 2080         | 24/6/2021     | 19.85     | 12.4     | 17.45     | 3.16 | 30.48              | 16.97  | 1.66      |
| Feraouni | Arsal              | 34.095397 | 36.409924 | 2080         | 5/7/2021      | 20.26     | 11.32    | 17.7      | 3.2  | 30.26              | 19.79  | 1.15      |
| Feraouni | Barqa              | 34.215077 | 36.132286 | 1930         | 28/6/2021     | 27.63     | 11.79    | 18.66     | 3.17 | 52.86              | 16.16  | 1.24      |
| Feraouni | Kaa El Reem (High) | 33.888591 | 35.872562 | 1600         | 7/6/2021      | 23.41     | 11.19    | 13.2      | 3.18 | 33.89              | 17.48  | 1.63      |
| Feraouni | Kaa El Reem (High) | 33.888591 | 35.872562 | 1600         | 10/6/2021     | 23.89     | 11.2     | 13.68     | 3.19 | 37.08              | 17.84  | 1.33      |
| Feraouni | Kaa El Reem (High) | 33.888591 | 35.872562 | 1600         | 17/6/2021     | 26.54     | 10.8     | 16.9      | 3.22 | 46.17              | 20.99  | 1.08      |
| Feraouni | Kaa El Reem (High) | 33.888591 | 35.872562 | 1600         | 21/6/2021     | 25.05     | 9.66     | 16.08     | 3.27 | 40.13              | 20     | 0.95      |
| Feraouni | Kaa El Reem (High) | 33.888591 | 35.872562 | 1600         | 28/6/2021     | 25.56     | 9.97     | 20.79     | 3.37 | 46.09              | 18.98  | 0.88      |
| Feraouni | Kaa El Reem (Low)  | 33.888591 | 35.872562 | 1280         | 31/5/2021     | 23.36     | 12.66    | 16.97     | 3.19 | 35.15              | 20.93  | 1.22      |
| Feraouni | Qousaya            | 33.807742 | 36.02482  | 1130         | 31/5/2021     | 21.01     | 13.53    | 18.2      | 2.96 | 25.27              | 24.24  | 1.45      |
| Feraouni | Qousaya            | 33.807742 | 36.02482  | 1130         | 3/6/2021      | 21.16     | 12.37    | 18.05     | 2.92 | 27.03              | 25.33  | 1.53      |
| Irani    | Barqa              | 34.215077 | 36.132286 | 1930         | 17/6/2021     | 25.83     | 9.3      | 15.98     | 3.32 | 41.64              | 18.62  | 1.27      |
| Irani    | Barqa              | 34.215077 | 36.132286 | 1930         | 21/6/2021     | 25.96     | 9.75     | 18.67     | 3.18 | 51.31              | 18     | 1.07      |
| Irani    | Barqa              | 34.215077 | 36.132286 | 1930         | 28/6/2021     | 27.63     | 9.33     | 20.45     | 3.34 | 49.12              | 18.34  | 0.84      |
| Irani    | Kaa El Reem (High) | 33.888591 | 35.872562 | 1600         | 10/6/2021     | 27.24     | 13.35    | 19.65     | 3.22 | 45.65              | 23.14  | 1.26      |
| Irani    | Kaa El Reem (High) | 33.888591 | 35.872562 | 1600         | 14/6/2021     | 26.2      | 11.47    | 19.23     | 3.42 | 43.42              | 24.99  | 1.3       |
| Irani    | Kaa El Reem (High) | 33.888591 | 35.872562 | 1600         | 28/6/2021     | 28.03     | 9.82     | 23.75     | 3.31 | 49.79              | 23.8   | 0.82      |
| Irani    | Kaa El Reem (Low)  | 33.888591 | 35.872562 | 1280         | 31/5/2021     | 22.58     | 9.71     | 13.65     | 3.24 | 27.94              | 19.03  | 1.13      |
| Irani    | Kaa El Reem (Low)  | 33.888591 | 35.872562 | 1280         | 3/6/2021      | 22.54     | 10.4     | 14.12     | 3.32 | 27.69              | 19.03  | 1.11      |
| Irani    | Kaa El Reem (Low)  | 33.888591 | 35.872562 | 1280         | 7/6/2021      | 22.24     | 9.95     | 15.41     | 3.38 | 27.61              | 20.19  | 0.87      |
| Irani    | Qousaya            | 33.807742 | 36.02482  | 1130         | 31/5/2021     | 20.26     | 13.42    | 17.5      | 3.05 | 23.53              | 21.16  | 1.58      |
| Irani    | Qousaya            | 33.807742 | 36.02482  | 1130         | 3/6/2021      | 21.24     | 11.31    | 16.85     | 3    | 25.28              | 21.79  | 1.47      |
| Mkahhal  | Arsal              | 34.095397 | 36.409924 | 2080         | 5/7/2021      | 20.71     | 6.56     | 14.2      | 3.4  | 28.31              | 15.49  | 1.17      |
| Mkahhal  | Kaa El Reem (High) | 33.888591 | 35.872562 | 1600         | 10/6/2021     | 19.17     | 8.92     | 12.95     | 3.36 | 23.09              | 15.09  | 1.63      |
| Mkahhal  | Kaa El Reem (High) | 33.888591 | 35.872562 | 1600         | 17/6/2021     | 23.48     | 7.35     | 12.1      | 3.35 | 32.53              | 16.19  | 1.09      |
| Mkahhal  | Kaa El Reem (High) | 33.888591 | 35.872562 | 1600         | 21/6/2021     | 23.07     | 8.32     | 14.69     | 3.21 | 33.69              | 16.5   | 1.02      |
| Mkahhal  | Kaa El Reem (High) | 33.888591 | 35.872562 | 1600         | 28/6/2021     | 24.8      | 6.6      | 17.32     | 3.4  | 42                 | 16.54  | 0.93      |
| Mkahhal  | Kaa El Reem (Low)  | 33.888591 | 35.872562 | 1280         | 3/6/2021      | 22.72     | 8.02     | 13.64     | 3.19 | 37.53              | 18.46  | 1.54      |
| Mkahhal  | Kaa El Reem (Low)  | 33.888591 | 35.872562 | 1280         | 7/6/2021      | 24.5      | 7.9      | 13.96     | 3.33 | 39.51              | 19.87  | 1.32      |
| Mkahhal  | Kaa El Reem (Low)  | 33.888591 | 35.872562 | 1280         | 10/6/2021     | 24.8      | 9        | 15.7      | 3.34 | 43.64              | 19.63  | 1.42      |
| Mkahhal  | Qousaya            | 33.807742 | 36.02482  | 1130         | 3/6/2021      | 20.53     | 10.01    | 13.63     | 3.35 | 26.07              | 17.91  | 1.87      |
| Mkahhal  | Qousaya            | 33.807742 | 36.02482  | 1130         | 7/6/2021      | 21.97     | 9.25     | 15.07     | 3.32 | 28.34              | 19.19  | 1.5       |
| Skeena   | Kaa El Reem (High) | 33.888591 | 35.872562 | 1600         | 21/6/2021     | 26.45     | 9.57     | 17.17     | 3.1  | 46.06              | 17     | 1.27      |
| Skeena   | Kaa El Reem (High) | 33.888591 | 35.872562 | 1600         | 24/6/2021     | 26.12     | 9.27     | 16.53     | 3.24 | 54.01              | 18.43  | 1.18      |
| Skeena   | Kaa El Reem (High) | 33.888591 | 35.872562 | 1600         | 28/6/2021     | 27.12     | 9.67     | 20.05     | 3.16 | 49.08              | 18.89  | 1.15      |
| Teliani  | Arsal              | 34.095397 | 36.409924 | 2080         | 10/6/2021     | 23.29     | 8.4      | 17.05     | 3.64 | 34.88              | 19.26  | 1.07      |
| Teliani  | Barqa              | 34.215077 | 36.132286 | 1930         | 31/5/2021     | 23.3      | 6.9      | 11.44     | 3.47 | 30.98              | 15.7   | 0.83      |
| Teliani  | Barqa              | 34.215077 | 36.132286 | 1930         | 3/6/2021      | 24.11     | 6.86     | 12.63     | 3.38 | 35.08              | 17.35  | 0.84      |

Supplementary Table S4: List of primers used for quantitative real-time PCR

| Accession No.  | Gene Name                   | Gene abbreviation | Primer name   | Sequences 5'-3'      |
|----------------|-----------------------------|-------------------|---------------|----------------------|
| XM_021970433.1 | Auxin response factor 8     | ARF8              | Pa-ARF8-F     | TTGGGTGGTTTCTCTCTGG  |
|                |                             |                   | Pa-ARF8-R     | CTAGCCTCTGCGCTCTCTGT |
| XM_021966615.1 | Auxin-responsive protein    | IAA 29            | Pa-IAA29-F    | GGTGGGAATTGTGAGGAAGA |
|                |                             |                   | Pa-IAA29-R    | GCACGGACTTGATGAAGGTT |
| XM_021959041.1 | Auxin response factor 2B    | ARF2B             | Pa-ARF2B-F    | GTGAACGGGAACGTGTCTTT |
|                |                             |                   | Pa-ARF2B-R    | ACCTCATCAGTGTCCGGTTC |
| XM_021970645.1 | Abscisic acid receptor PYL8 | AAR PLY8          | Pa-AAR PYL8-F | TTTGTACAGAGGTGTGTGGT |



|                |                                                          |          |               |                      |
|----------------|----------------------------------------------------------|----------|---------------|----------------------|
|                |                                                          |          | Pa-AAR PYL8-R | TCTCTGGATGGAGGGAGATG |
| XM_021970784.1 | Abscisic acid receptor PYL4                              | AAR PLY4 | Pa-AAR PYL4-F | GGAGATCCTGGACGATGAGA |
|                |                                                          |          | Pa-AAR PYL4-R | ATCGTGTCCACGAACGTACA |
| XM_021977028.1 | GATA transcription factor 25                             | GATA25   | Pa-GATA25-F   | TCAGGATGCACGTAACAAG  |
|                |                                                          |          | Pa-GATA25-R   | CCACAAGCATTGCAAAGAGA |
| XM_021962427.1 | <i>Prunus avium</i> protein TIFY 9                       | TIF Y9   | Pa-TIFY9-F    | AGCAAATCCCATTTCCTCT  |
|                |                                                          |          | Pa-TIFY9-R    | CAATATGCTCCCAGCCTTGT |
| XM_021951712.1 | Ethylene receptor 2-like                                 | ETR2L    | Pa-ER2L-F     | TGGAAGTCAGGGAAGGAATG |
|                |                                                          |          | Pa-ER2L-R     | TGCAAATGGTGAAGCTCAAG |
| XM_021975856.1 | Cytokinin dehydrogenase 5                                | CKK5     | Pa-CD5-F      | GCTAGGGCAATTTGGAATCA |
|                |                                                          |          | Pa-CD5-R      | AATCGAACTTGTGGGTGGAG |
| XM_021956635.1 | Cytokinin riboside 5'-monophosphate phosphoribohydrolase | LOG5     | Pa-CR LOG1-F  | TAGCCCAGGAAAGAAAAGCA |
|                |                                                          |          | Pa-CR LOG1-R  | TTCACCTCCCCACTGTTTC  |
| XM_021956636.1 | Gibberellin-regulated protein 14                         | GRP14    | Pa-GRP14-F    | CAGTCCTCCTAAGCTTCCA  |
|                |                                                          |          | Pa-GRP14-R    | CTGACAGGAGTGGGTGGAGT |
| XM_021971185.1 | Gibberellin 20 oxidase 2                                 | GA20ox2  | Pa-G20 O2-F   | TTGGGTGGTTTTCTCTCTGG |
|                |                                                          |          | Pa-G20 O2-R   | CTAGCCTCTGCGCTCTCTGT |
| XM_021976055.1 | <i>Prunus avium</i> actin-7                              | A7       | Pa-A7-F       | TCAATGTGCCTGCCATGTAT |
|                |                                                          |          | Pa-A7-R       | AGCAAGGTCCAGACGAAGAA |
| XM_021975187.1 | <i>Prunus avium</i> histone H3.2                         | H3       | Pa-H3.2-F     | GCAAGCTTCCATTTAGAGG  |
|                |                                                          |          | Pa-H3.2-R     | CTCTCGCCTCTGATCCTACG |

Supplementary Table S5: Average hormone quantification in the 6 evaluated sweet cherry varieties.

| Variety         | Absciscic_Acid_ABA<br>(ng/g DW) | Salicylic_Acid_SA<br>(ng/g DW) | Gibberellic_Acid_GA3<br>(ng/g DW) | Benzyl_Adenine_BA<br>(ng/g DW) | Zeatin<br>(ng/g DW) |
|-----------------|---------------------------------|--------------------------------|-----------------------------------|--------------------------------|---------------------|
| <b>Feraouni</b> | 7.00                            | 8.03                           | 1.40                              | 0.10                           | 2.92                |
| <b>Banni</b>    | 17.94                           | 6.14                           | 1.58                              | 0.05                           | 2.98                |
| <b>Irani</b>    | 8.73                            | 4.37                           | 1.43                              | 0.17                           | 2.71                |
| <b>Mkahal</b>   | 17.63                           | 8.89                           | 1.78                              | 0.10                           | 5.31                |
| <b>Skeena</b>   | 3.06                            | 2.33                           | 2.25                              | 0.26                           | 2.45                |
| <b>Teliani</b>  | 11.32                           | 2.79                           | 1.24                              | 0.60                           | 1.50                |
| <b>Average</b>  | <b>10.95</b>                    | <b>5.42</b>                    | <b>1.61</b>                       | <b>0.21</b>                    | <b>2.98</b>         |



Supplementary Table S6: Genotype x Location interaction for evaluated hormones

| Variety     | Location | Abscisic Acid_ABA | Salicylic Acid_SA | Gibberellic Acid_GA3 | Benzyl Adenine_BA | Zeatin         |
|-------------|----------|-------------------|-------------------|----------------------|-------------------|----------------|
| Feraouni    | KER high | 9.35 ± 2.51       | 8.70 ± 1.74 ab    | 1.57 ± 0.17          | 0.12 ± 0.03       | 2.57 ± 0.36    |
|             | QOU      | 5.16 ± 0.69       | 3.70 ± 0.29 a     | 0.90 ± 0.06          | 0.13 ± 0.03       | 3.39 ± 0.24    |
|             | ARS      | 5.43 ± 2.07       | 7.35 ± 1.14 ab    | 1.26 ± 0.28          | 0.070 ± 0.01      | 3.32 ± 0.73    |
|             | BAR      | 5.52 ± 0.08       | 9.36 ± 0.03 ab    | 2.18 ± 0.13          | 0.1 ± 0.005       | 2.34 ± 0.09    |
|             | KER low  | 3.52 ± 0.04       | 13.42 ± 0.92 b    | 1.12 ± 0.02          | 0.07 ± 0.01       | 3.54 ± 0.12    |
| Skeena      | KER high | 3.06 ± 0.34       | 2.33 ± 0.37       | 2.25 ± 0.14          | 0.26 ± 0.02       | 2.45 ± 0.14    |
| Banni       | KER high | 17.78 ± 0.33      | 6.39 ± 0.35       | 0.91 ± 0.18          | 0.04 ± 0.0001     | 1.84 ± 0.02 b  |
|             | ARS      | 18.11 ± 0.24      | 5.88 ± 0.18       | 2.24 ± 0.07          | 0.06 ± 0.02       | 4.11 ± 0.07 a  |
| Irani       | KER high | 5.20 ± 2.04       | 2.46 ± 0.38 b     | 1.16 ± 0.17          | 0.14 ± 0.02       | 1.57 ± 0.27 b  |
|             | QOU      | 8.76 ± 3.13       | 3.48 ± 0.26 ab    | 1.41 ± 0.09          | 0.14 ± 0.06       | 4.16 ± 0.83 a  |
|             | BAR      | 12.56 ± 4.46      | 8.65 ± 1.56 a     | 1.9 ± 0.34           | 0.24 ± 0.02       | 1.88 ± 0.17 ab |
|             | KER low  | 8.39 ± 1.45       | 2.59 ± 0.63 b     | 1.25 ± 0.06          | 0.22 ± 0.02       | 3.71 ± 0.47 ab |
| Teliani     | ARS      | 18.96 ± 0.14 a    | 2.31 ± 0.46       | 1.94 ± 0.01          | 1.17 ± 0.01 a     | 1.48 ± 0.01    |
|             | BAR      | 7.50 ± 0.86 b     | 3.03 ± 0.23       | 0.89 ± 0.34          | 0.31 ± 0.02 b     | 1.51 ± 0.12    |
| Mkahal      | KER high | 22.38 ± 7.11      | 11.77 ± 1.81 a    | 1.90 ± 0.15          | 0.13 ± 0.02       | 6.17 ± 0.6     |
|             | QOU      | 14.93 ± 1.79      | 5.04 ± 0.39 b     | 1.52 ± 0.19          | 0.13 ± 0.04       | 5.53 ± 0.37    |
|             | ARS      | 17.5 ± 0.02       | 4.97 ± 0.14 b     | 1.63 ± 0.15          | 0.07 ± 0.01       | 4.49 ± 0.01    |
|             | KER low  | 13.15 ± 2.9       | 8.93 ± 0.56 ab    | 1.83 ± 0.17          | 0.05 ± 0.02       | 4.28 ± 0.35    |
| Interaction |          |                   | **                | **                   | ***               | ***            |



Supplementary Figure S1: Map of Lebanon describing harvested locations

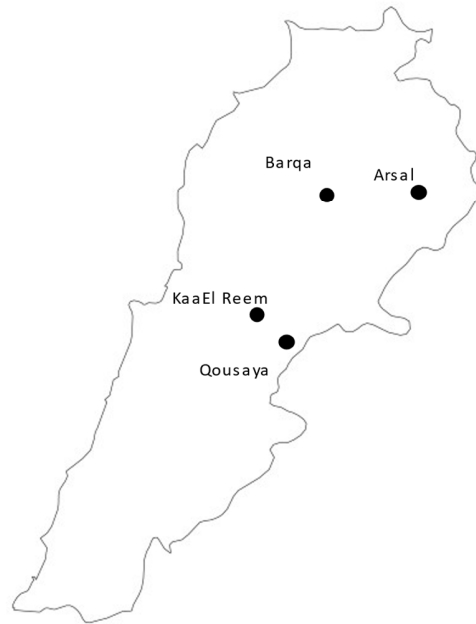



Supplementary Figure S2: Phytohormones contents (ng/g DW) in sweet cherry fruits harvested at several ripening stages in different locations.

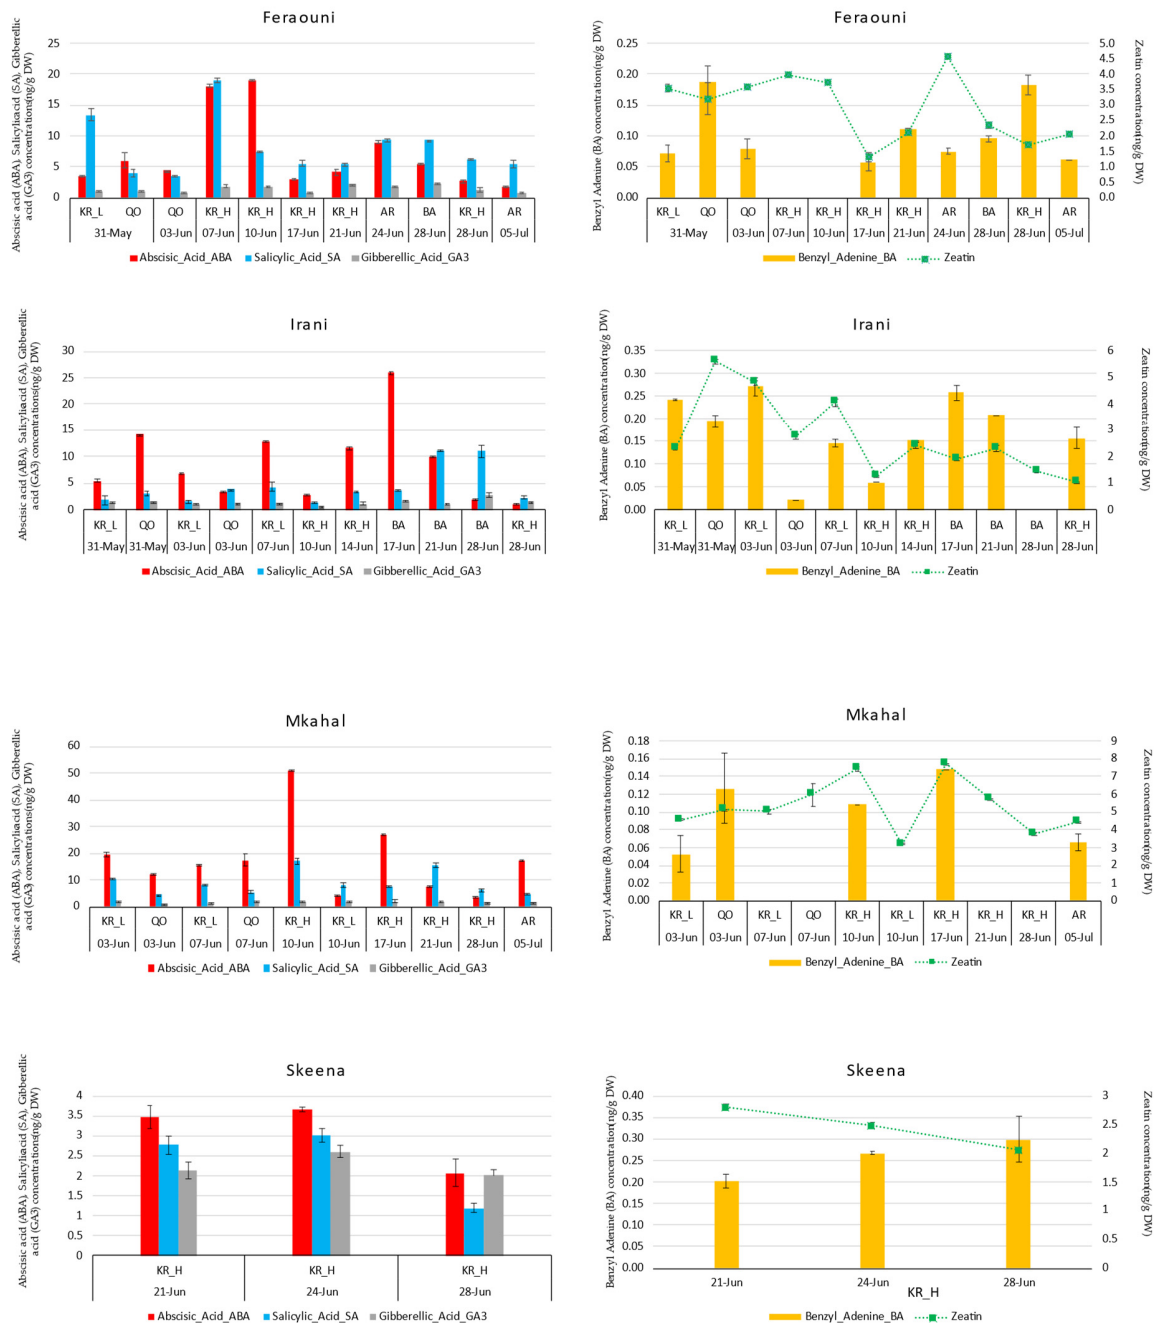



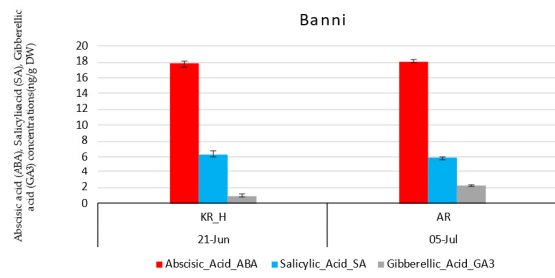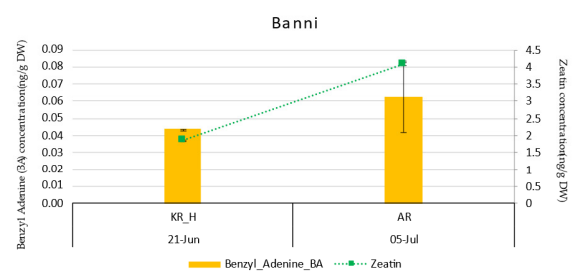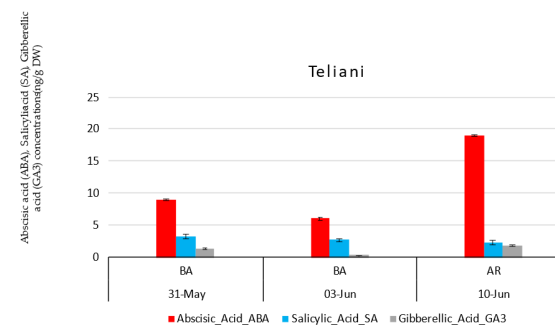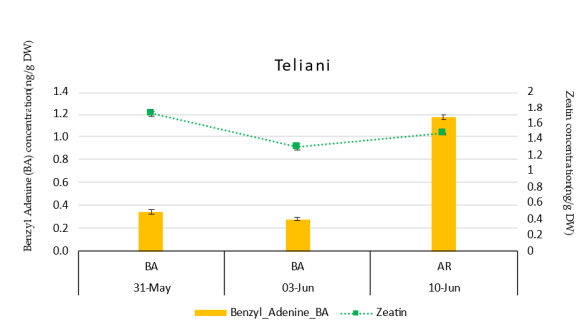

Supplement: s1 [file s1]
